1 Age-Related Central Gain with Degraded Neural Synchrony in the Auditory Brainstem of Mice and Humans

2 Abbreviated title: Central Gain and Degraded Brainstem Synchrony with Age

3 Jeffrey A. Rumschlag\*<sup>1</sup>, Carolyn M. McClaskey<sup>1</sup>, James W. Dias<sup>1</sup>, Lilyana B. Kerouac<sup>1</sup>, Kenyaria V. Noble<sup>3</sup>,

4 Clarisse Panganiban<sup>4</sup>, Hainan Lang<sup>2</sup>, and Kelly C. Harris<sup>1</sup>

5 <sup>1</sup>Department of Otolaryngology-Head & Neck Surgery, Medical University of South Carolina, 135 Rutledge  
6 Avenue, MSC 550, Charleston, SC, 29425, USA

7 <sup>2</sup>Department of Pathology and Laboratory Medicine, Medical University of South Carolina, 171 Ashley Avenue,  
8 MSC 908, Charleston, SC, 29425-9080, USA

9 <sup>3</sup>Akouos, Inc. 645 Summer St, Boston, MA 02210

10 <sup>4</sup>Wolfson Centre for Age-Related Diseases, King's College London, Hodgkin Building, Guy's Campus, London  
11 SE1 1UL, UK

12 \* Corresponding Author: Jeffrey A. Rumschlag; rumschla@musc.edu

13

14 **Abstract (≤170 words-159 words)**

15 Aging is associated with auditory nerve (AN) functional deficits and decreased inhibition in the central auditory  
16 system, amplifying central responses in a process known as central gain. Although central gain enhances  
17 response amplitudes, central gain may not restore disrupted response timing. In this translational study, we  
18 measured responses from the AN and auditory midbrain in younger and older mice and humans. We  
19 hypothesized that older mice and humans exhibit central gain without an improvement in inter-trial synchrony  
20 in the midbrain. Our data demonstrated greater age-related deficits in AN response amplitudes than auditory  
21 midbrain response amplitudes, as shown by significant interactions between neural generator and age group,  
22 indicating central gain in auditory midbrain. However, synchrony decreases with age in both the AN and  
23 midbrain responses. These results reveal age-related central gain without concomitant improvements in  
24 synchrony, consistent with those predictions based on decreases in inhibition. Persistent decreases in  
25 synchrony may contribute to auditory processing deficits in older mice and humans.

26 **Keywords:** aging, central gain, auditory nerve, auditory midbrain, neural synchrony

27

28 **1. Introduction**

29 Age-related loss of afferent AN fibers is well established, and this loss predicts auditory processing and  
30 speech recognition difficulties. However, these AN deficits appear to be ameliorated by central gain  
31 mechanisms, where the central nervous system compensates for a loss of afferent input by amplifying central  
32 responses (Dias et al., 2018; Gmehlin et al., 2011; Harris et al., 2012; Price et al., 2017; Tremblay et al., 2004;  
33 Woods and Clayworth, 1986; Pfefferbaum et al., 1979). Despite restoration of response amplitudes, auditory  
34 processing difficulties persist. One potential explanation for these continued difficulties is a disruption in neural  
35 synchrony. Neural synchrony is fundamental to auditory processing in difficult listening conditions, and  
36 increased neural jitter has been hypothesized to contribute to deficits observed in older adults. The current  
37 manuscript tests the hypothesis that while central gain may restore response amplitudes, deficits in neural  
38 synchrony persist and are propagated through the central auditory system.

39 Central gain is hypothesized to be associated with age-related declines in central inhibition. Aging is  
40 associated with declines in inhibitory transmission throughout the brain, possibly as a result of changes to  
41 gamma-aminobutyric acid (GABA) and glycine receptor composition (Casparly, 2008). Furthermore, the

42 expression of markers of inhibitory interneurons decreases with age in mice (Brewton et al., 2016; Rogalla &  
43 Hildebrandt, 2020; Ueno et al., 2018), rats (Cisneros-Franco et al., 2018; Ouda et al., 2008; Ouellet & de  
44 Villers-Sidani, 2014), and humans (Mohan et al., 2018). The aging central auditory system may compensate  
45 for decreased afferent input with a reduction of inhibitory activity, resulting in the amplification of auditory  
46 signaling afferent to the AN, in a process known as central gain (Casparly et al., 2008).

47 To evaluate auditory central gain in younger and older mice and humans, we recorded compound  
48 action potentials (CAP) and auditory brainstem responses (ABR). The relationship between AN (ABR wave I or  
49 CAP N1) and midbrain (ABR wave V) responses can be used to estimate central gain. Central gain in the  
50 aging auditory system has been demonstrated by an increase in wave V/I ratio in animal models (Cai et al.,  
51 2018; Möhrle et al., 2016; Parthasarathy & Kujawa, 2018; Sergeyenko et al., 2013), and in humans (Grose et  
52 al., 2019; Psatta & Matei, 1988; Sand, 1991). This increase in wave V/I ratio arises either from larger response  
53 amplitudes at the midbrain (wave V) relative to AN or from an age-related decrease in ABR wave I amplitude  
54 without a decrease in wave V amplitude. Combining wave I and wave V into a single metric entangles their  
55 variabilities, limiting our ability to identify how different parts of the auditory system change with age, so this  
56 study instead uses linear mixed-effects regression (LMER) models to assess central gain. In this approach,  
57 central gain is indicated by an interaction between wave (wave I or wave V) and age group.

58 While central gain following acute insults has been well-characterized in animal models, less is known  
59 regarding chronic conditions like aging. Mouse models of acute cochlear insults, such as ouabain toxicity and  
60 noise-induced hearing loss, show that central gain manifests following a loss of afferent input. Eliminating  
61 >95% of Type-I SGN synapses and neuron somas via application of ouabain to the round window leads to a  
62 severe reduction in ABR wave I amplitude and a reduction in auditory-evoked activity in the inferior colliculus  
63 (Lang et al., 2010; Chambers et al., 2016). After 30 days, however, although ABR wave I amplitudes do not  
64 appear to recover significantly, midbrain responses are partially recovered. Central gain also develops  
65 following damaging broadband noise exposure, but peripheral neural and behavioral auditory deficits persist,  
66 as evidenced by decreased suprathreshold amplitudes and poor high frequency tone detection (Schrode et al.,  
67 2018). Similarly, age-related central gain does not appear to fully rescue behavioral auditory function.

68 In older adults, increased jitter in response timing is hypothesized to contribute to auditory processing  
69 deficits. Neural synchrony across trials, measured as the phase-locking value (PLV), has been demonstrated

70 to predict speech recognition (Harris et al., 2021). In this study, we calculated the PLV of CAP and ABR  
71 responses to estimate neural synchrony (Harris et al., 2018, 2021, McClaskey et al., 2020). Models of  
72 amplitude and synchrony were then compared to determine whether age-related central gain improves  
73 synchrony in mice and human.

74 We hypothesized that central gain would be apparent in the aging auditory system of both mouse and  
75 human, as indicated by preserved midbrain responses (ABR wave V amplitudes), in contrast to decreased AN  
76 responses (ABR wave I or CAP N1 amplitudes). Furthermore, we predicted that the synchrony of the signals  
77 measured from both the peripheral and central portions of the auditory system would be significantly lower in  
78 older subjects relative to younger, suggesting central gain-related increases in response amplitudes are not  
79 reflected in a preservation or enhancement of neural synchrony. This results from this study demonstrate that  
80 central gain occurs without improvements in neural synchrony, and it informs future translational studies  
81 exploring the consequences of midbrain neural dyssynchrony for auditory perception.

## 82 **2. Materials and Methods**

### 83 ***Mice***

84 All studies were performed in accordance with the guidelines of the Institutional Animal Care and Use  
85 Committee of the Medical University of South Carolina (MUSC). CBA/CaJ mice were originally purchased from  
86 The Jackson Laboratory (Bar Harbor, ME) and bred in the MUSC Animal Research Facility. The mice were  
87 housed in a vivarium with a 12h light/dark cycle and given standard lab chow and water *ad libitum*. Included in  
88 this study are 14 younger mice (mean age = 2.5 (SD 0.6) months; 8 females; 24 ears) and 9 older mice (mean  
89 age = 25.8 (SD 3.5) months; 5 females; 16 ears). ABRs elicited by 85 dB SPL tone pips at 5.6, 11.3, and 40  
90 kHz, were recorded from all mice. The average ABR wave I thresholds at 11.3 kHz were 22.9 (SD 4.6) dB SPL  
91 for the younger mice and 55 (SD 11.3) dB SPL for the older mice (5 kHz: younger: 41.4 (SD 8.3) dB SPL;  
92 older: 67.3 (SD 10.1) dB SPL. 40 kHz: younger: 14.6 (SD 10.9) dB SPL; older: 57.3 (SD 18.6) dB SPL). Group  
93 averaged ABR wave I thresholds are shown in Figure 1A.

### 94 ***Human Participants***

95 Participants included two groups of adults from the Charleston community: younger adults (N = 39;  
96 mean age = 24.1 (SD 3.1) years; 26 females) and older adults (N = 57; mean age = 66.0 (SD 6.6) years; 40

97 females). The participants were native English speakers with no otological or neurological impairments and  
98 had a Mini-Mental Status Examination score of at least 27. All recordings were done in the right ear. The  
99 younger participants had pure-tone thresholds  $\leq 20$  dB HL from 250 Hz to 8000 Hz. To examine central gain  
100 effects with age and age-related hearing loss, we included older adults with hearing thresholds ranging from  
101 normal limits to sloping or moderate-to-severe SNHL. Older adults were included if their hearing loss at or  
102 below 4 kHz did not exceed 65 dB HL. Group averages of audiometric thresholds with 95% confidence  
103 intervals are shown in Figure 1B. Participants provided written informed consent before participating in this  
104 study. Testing was initiated after approval by the Medical University of South Carolina's Institutional Review  
105 Board.

### 106 **Mouse ABR Recordings**

107 Mice were anesthetized via an intraperitoneal injection of a cocktail containing 20 mg/kg xylazine and  
108 100 mg/kg ketamine. ABRs were recorded in an acoustically isolated booth. Subdermal needle electrodes  
109 were placed in the vertex of the scalp (recording electrode), in the ipsilateral mastoid (reference), and in the  
110 hind limb (ground). Electrodes were connected to a low-impedance head stage connected to a pre-amplifier  
111 (RA4LI/RA4PA, Tucker-Davis Technologies, Alachua, FL), and impedances were tested prior to each

112 recording session and  
113 did not exceed 3 k $\Omega$ .

114 The pre-amplifier was  
115 connected via optical  
116 cable to an RZ6  
117 input/output device  
118 (Tucker-Davis

119 Technologies), which  
120 was used to produce

121 stimuli via BioSigRZ  
122 software (Tucker-Davis  
123 Technologies).

124 Responses were

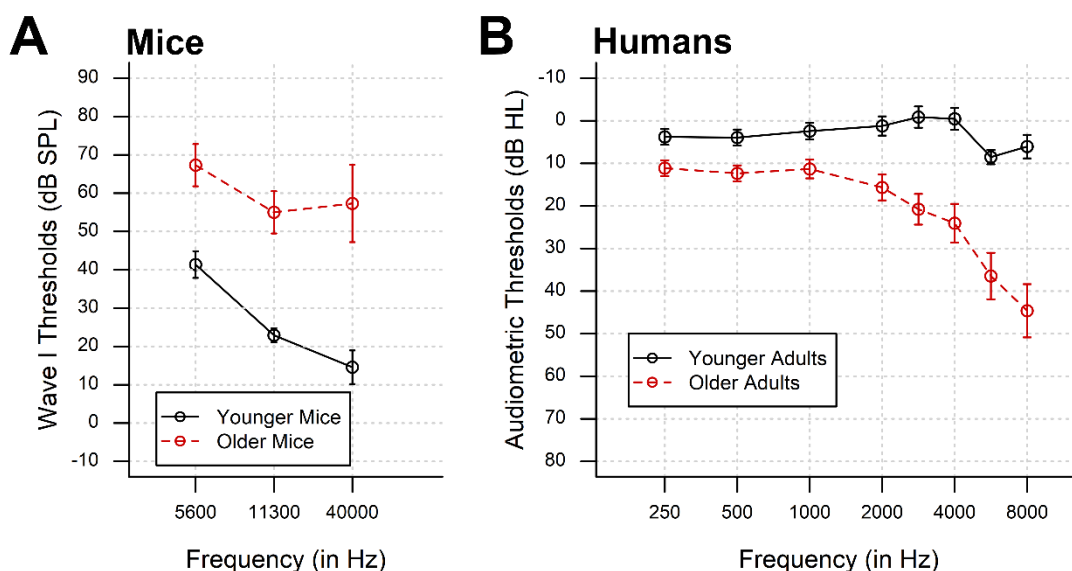

121 **Figure 1.** (A) ABR wave I thresholds in older mice are moderately elevated. (B)

122 Right-ear pure-tone audiometric thresholds for younger and older human participants  
123 demonstrate greater hearing loss at higher frequencies. Error bars represent 95%  
124 confidence intervals.

125 recorded with RPvdsEx software (Tucker-Davis Technologies) at 24.414 kHz. ABRs were elicited by 85 dB  
126 SPL tone pips at 5.6 kHz, 11.3 kHz, and 40 kHz, which are represented in the apical, middle, and basal  
127 portions of the mouse cochlea, respectively. At least 515 tone pips of each frequency were presented. Closed-  
128 field stimuli were presented through an MF1 speaker (Tucker-Davis Technologies), coupled to a 3-mm  
129 diameter plastic tube and earpiece (total length, 1.6-1.8 cm), inserted into the ear canal. Calibration was  
130 performed using a 378C01 ICP microphone system (PCB Piezotronics, Inc., NY, USA), including a ¼" PCB  
131 426 B03 032090 transducer (ICP@Sensor) and a model 480C02 battery-powered signal conditioner.

132 For each trace, if fewer than 300 trials were valid due to movement or noise artifacts, then that trace  
133 was excluded from further processing. Final analyses included recordings from 14 younger (5.6 kHz: 22 ears,  
134 11.3 kHz: 24 ears, and 40 kHz: 24 ears) and 9 older mice (5.6 kHz: 11 ears, 11.3 kHz: 16 ears, and 40 kHz: 13  
135 ears).

### 136 ***Human CAP and ABR Recordings***

137 CAPs and ABRs were recorded simultaneously in humans. Responses were elicited by 110 dB SPL,  
138 100 µs rectangular pulses with alternating polarity, presented at 11.1 Hz to the right ear through an insert  
139 earphone (ER-3c; Etymotic Technologies), and responses were recorded from the right ear using a tympanic  
140 membrane electrode (Sanibel Supply, Eden Prairie, MN). The recording electrode was referenced to the left  
141 mastoid and grounded to an electrode placed on the low forehead, which was shared between the CAP and  
142 ABR setups. ABRs were recorded using an active electrode placed on the high forehead, referenced to the  
143 right mastoid, and grounded to the low forehead. The electrodes were connected to a custom headstage  
144 (Tucker Davis Technologies), which was connected to the bipolar channels of a Neuroscan SynAmpsRT  
145 amplifier in AC mode with 2010x gain (Compumedics USA, Charlotte, NC). Responses were recorded in  
146 blocks of 1100 trials (550 of each polarity) in CURRY (versions 7 and 8, Compumedics USA, Charlotte, NC) at  
147 a 20 kHz sampling rate and stored offline. During the recording, participants reclined in a chair in an  
148 acoustically and electrically shielded room. Participants were encouraged to sleep or rest quietly for the  
149 duration of the recording and to limit unnecessary or excessive movement.

## 152 **Peak Measurement**

153 Recordings of continuous neural activity from mice and humans were analyzed in MATLAB  
154 (MathWorks, Natick, MA) using standard functions from EEGLAB (Delorme & Makeig, 2004) and ERPLAB  
155 (Lopez-Calderon & Luck, 2014). Recordings were bandpass filtered between 150 and 3000 Hz. The filtered  
156 recordings were epoched from -2 to 10 ms, relative to stimulus triggers, and baseline corrected to a pre-  
157 stimulus baseline of -2 ms to 0 ms (McClaskey et al., 2018). Aberrant individual responses were rejected  
158 based on a threshold of +/- 45  $\mu\text{V}$  and subsequent visual inspection. The validated epochs were averaged, and  
159 the relevant peaks were identified: ABR wave I and V were identified in mouse recordings (Figure 2A), and  
160 CAP N1 and ABR wave V were identified in human recordings (Figure 2B). Peak selection was performed by  
161 at least two independent reviewers and assessed for repeatability across multiple runs. The reviewers were  
162 blinded to participant age group. Peak latencies and amplitudes were recorded for later analysis.

## 163 **Synchrony (PLV)**

164 PLV is a measure of the inter-trial coherence of the response, calculated for each time-frequency point  
165 as the magnitude of the trial-averaged phase vector. Whereas response amplitude is determined both by  
166 temporal jitter and by the response amplitudes within each trial, PLV reflects temporal jitter, independent from  
167 response amplitudes. Therefore, while PLV and response amplitudes both increase as stimulus level  
168 increases, as shown previously (Harris et al., 2018, 2021; McClaskey et al., 2020), examining these two  
169 measures together provides a means to dissociate synchrony from amplitude. PLV is calculated from a  
170 complex time-frequency transform, using the following equation, in which  $F_k(f, t)$  is the spectral estimate of trial  
171  $k$  at frequency  $f$  and time  $t$ :

$$172 \quad PLV(f, t) = \frac{1}{n} \sum_{k=1}^n \frac{F_k(f, t)}{|F_k(f, t)|}$$

173 In this study, Hanning FFT tapers were applied to the continuous neural activity data, using the  
174 `newtimef()` function in EEGLAB. We analyzed 16 linearly spaced frequencies from 625 Hz to 2500 Hz, using a  
175 pad-ratio of 2 and a window size of 32 samples. For each of the peaks, the maximum PLV was extracted from  
176 a 2-ms window centered on the response latency (Figure 2C-D).

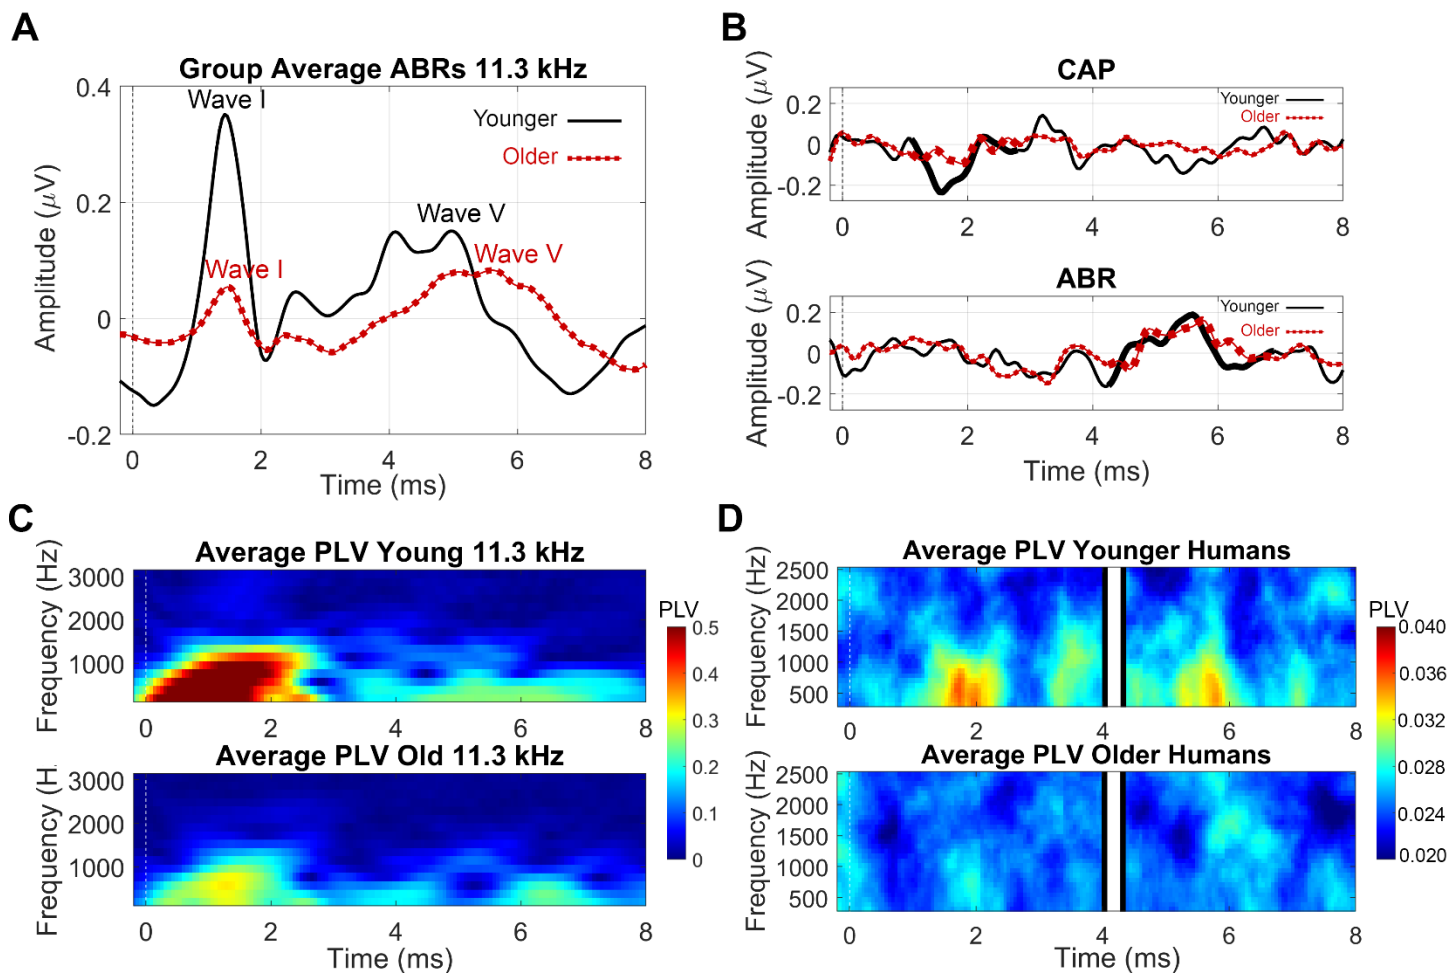

**Figure 2.** (A) Peak measurement locations for wave I and wave V are shown with vertical dotted lines on grand average ABR waveforms from younger (black line) and older (red line) mice, elicited by 11 kHz tone pips. (B) Average CAP and ABR waveforms recorded from younger (black line) and older (red line) humans are shown. The CAP N1 and ABR wave V are traced in thicker lines. (C) Average PLV heatmaps from mice depict synchronous activity corresponding to waves I and V of the ABR. (D) Average PLV heatmaps from human CAP (left panel) and ABR (right panel) recordings are shown on the same time axis, with 0-4 ms of the CAP and 4.3-8 ms of the ABR, to capture the CAP N1 and the ABR wave V.

## 177 Analytical Approach

178 In this study, central gain in humans was measured from CAP N1 and ABR wave V amplitudes. To  
179 allow for the comparison of these two measures while preserving the variability within each measure,  
180 standardized LMER models were used instead of amplitude ratios. We used LMER models to test for  
181 amplitude differences between wave I and wave V and between younger and older mice and human subjects.  
182 LMER is a non-parametric statistical approach that can test hypothesis-driven relationships between predictor  
183 and outcome variables while accounting for individual variability between subject groups (i.e., age-groups –  
184 younger and older) and variability between levels of a dependent variable that is nested within subjects (i.e.,



185 ABR waves – I and V). We employed a hierarchical model-  
186 testing approach to determine whether aging affects AN  
187 and midbrain responses differently. We fit hypothesis-  
188 driven LMER models to the AN and midbrain response  
189 measurements using the lme4 package for R (x64 v4.0.5).  
190 Amplitude and PLV at each frequency were modeled  
191 separately (e.g., Harris et al., 2018, 2021; McClaskey et al.,  
192 2020).

193 First, we tested the degree to which amplitude or  
194 PLV was different between age groups and between ABR  
195 wave I and wave V (in mice) or between CAP N1 and ABR  
196 wave V (in humans). To do this, age-group and wave were  
197 added to a main-effects LMER model with measure  
198 (amplitude or PLV) as the outcome variable and individual  
199 (human or mouse) as a random factor. If central gain is  
200 present in the aging auditory system, then ABR wave I or  
201 CAP N1 magnitude will decrease more than ABR wave V  
202 amplitude with age. To test this hypothesis, we added the  
203 wave number and age group interaction term to the main-  
204 effects model to determine if model fit was improved. If  
205 aging differentially affects the AN and midbrain

**Figure 3.** ABR wave I and wave V amplitudes from younger and older CBA/CaJ mice in response to 5.6 kHz (A), 11.3 kHz (B), and 40 kHz (C) tone pips demonstrate age-related central gain. Asterisks on brackets spanning wave I and wave V indicate a significant interaction of wave and age group. Asterisks within the age comparison plots indicate a significant post-hoc age-related effect. Detailed statistical results from these analyses appear in **Table 1**. *n.s.* not significant; \* $p < 0.05$ ; \*\* $p < 0.01$ ; \*\*\* $p < 0.001$ .

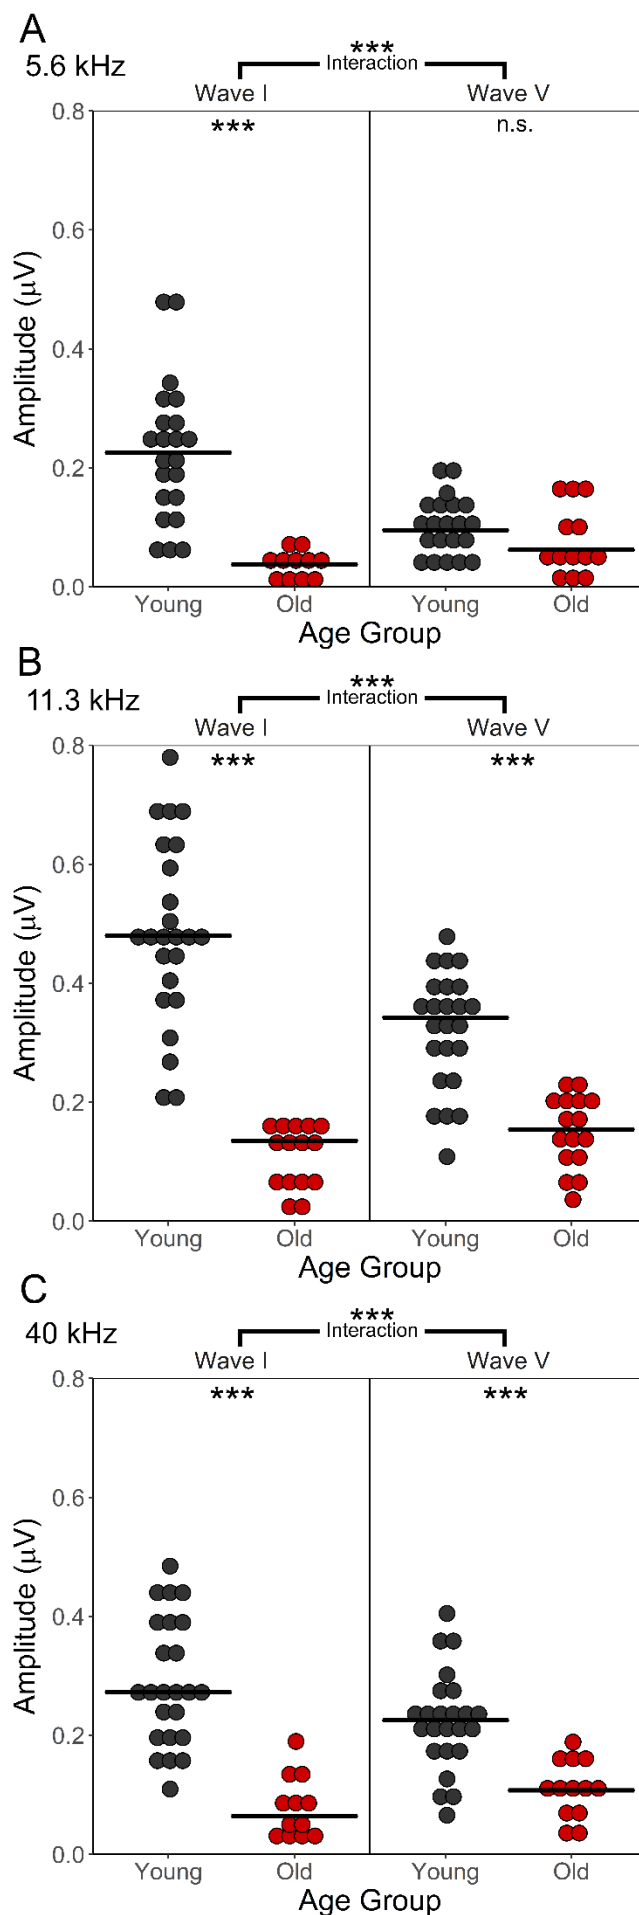

206 measurements, as would be expected with central gain,  
207 then the interaction will be significant, and including the  
208 interaction term will improve model fit. Post-hoc linear  
209 models (LMs) were conducted to explore significant  
210 interactions. For mice, these models were tested for each  
211 test frequency separately. To determine whether our results  
212 could be accounted for by age-related hearing loss or sex  
213 differences, a measure of audiometric threshold (ABR wave  
214 I threshold for mice; pure-tone average from 250 Hz to  
215 8000 Hz for humans) and individual sex were added to the  
216 LMER models to determine if model fit was improved.

### 3. Results

#### 3.1 ABR amplitudes demonstrate central gain in aging

218 **mice.** Figure 3 shows boxplots representing the response  
219 amplitudes for each of the mouse age groups for waves I  
220 and V in response to the tone pip stimuli of 5.6 kHz (Fig.  
221 3A), 11.3 kHz (Fig. 3B), and 40 kHz (Fig. 3C). Including the  
222 interaction term of wave number and age group improved  
223

**Figure 4.** ABR wave I and wave V phase-locking values measured from younger and older CBA/CaJ mice in response to 5.6 kHz (A), 11.3 kHz (B), and 40 kHz (C) tone pips demonstrate age-related degradation of neural synchrony in peripheral and central portions of the auditory system, which appear to be less severe in the midbrain at lower frequencies. Neural synchrony measurements (PLV) for 5.6 kHz (A) show a significant interaction of age group and wave, whereas PLV for 11.3 kHz (B) and 40 kHz (C) do not. Asterisks on brackets spanning wave I and wave V indicate a significant interaction of wave and age group. Asterisks within age comparison plots indicate a significant post-hoc age-related effect. Detailed statistical results from these analyses appear in **Table 2**. *n.s.* not significant; \* $p < 0.05$ ; \*\* $p < 0.01$ ; \*\*\* $p < 0.001$ .

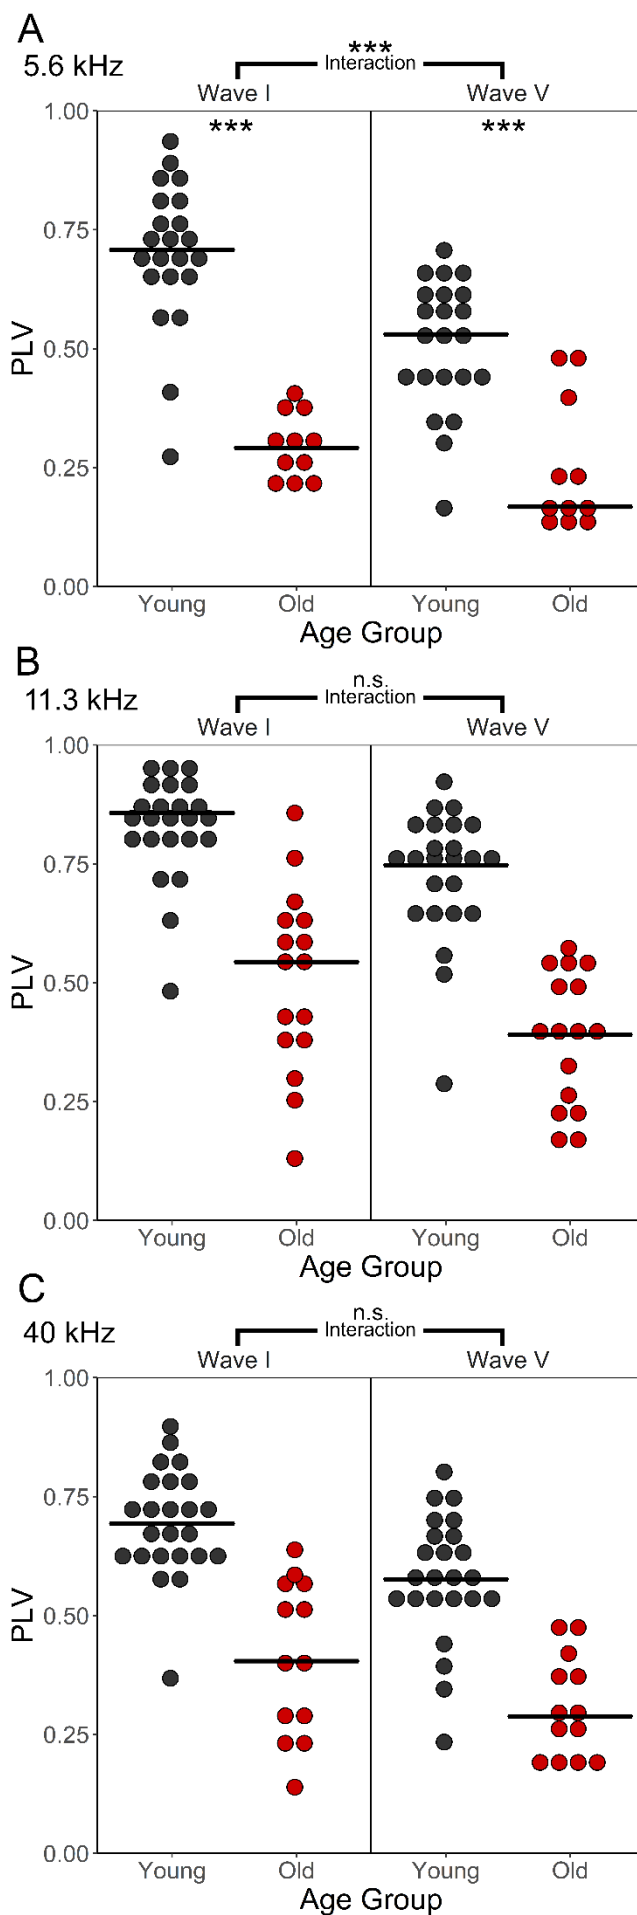

224 model fit for ABR response amplitudes over the main effects model for 5.6 kHz ( $\chi^2(1) = 22.371$ ,  $p < 0.001$ ),  
225 11.3 kHz ( $\chi^2(1) = 23.671$ ,  $p < 0.001$ ), and 40 kHz ( $\chi^2(1) = 11.193$ ,  $p < 0.001$ ), showing that age differentially  
226 impacts the AN and midbrain. The parameters for these models and post-hoc LM tests are reported in Table 1.  
227 Wave I amplitudes were larger than wave V amplitudes and the amplitudes of both waves decreased with age  
228 for all test frequencies. Post-hoc tests exploring the significant interaction of age group and wave for each test  
229 frequency (Table 1) found that age-related amplitude deficits in the AN exceeded those observed in the  
230 midbrain (i.e., larger  $\beta$ s; see also Fig. 3). Adding hearing thresholds or sex did not improve the fit of any of  
231 these models, nor did they prove to be significant predictors of response amplitudes.

232 **3.2 ABR phase-locking values indicate degraded neural synchrony in aging mice.** Figure 4 shows the  
233 wave I and wave V PLV for each age group at 5.6 kHz (Fig. 4A), 11.3 kHz (Fig. 4B), and 40 kHz (Fig. 4C). As  
234 reported in Table 2, across test-frequencies, PLV was smaller for older mice and for wave V. Including the  
235 interaction term for age group and wave improved model fit for the 5.6 kHz stimuli (Table 2,  $\chi^2(1) = 11.958$ ,  $p <$   
236  $0.001$ ). Post-hoc linear models found that age-related deficits in neural synchrony were greater in the AN than  
237 the midbrain (larger  $\beta$ ). The fit of our main effects model including age-group and wave was not improved by  
238 adding the interaction between wave and age group for the 11.3 kHz ( $\chi^2(1) = 0.377$ ,  $p = 0.539$ ) or 40 kHz ( $\chi^2(1)$   
239  $= 0.037$ ,  $p = 0.848$ ) test frequencies, suggesting that the synchrony of the responses to tone pips at these  
240 frequencies is uniformly degraded with age in both the peripheral and central portions of the auditory system.  
241 Adding hearing thresholds and sex did not improve the fit of any of these models, nor did they prove to be  
242 significant predictors of PLV.

243 **3.3 AN and midbrain response amplitudes demonstrate central gain in older humans.** CAP N1 and ABR  
244 wave V response amplitudes are summarized in Figure 5. Including the interaction term between wave and  
245 age group improved the fit of our main effects LMER model ( $\chi^2(1) = 4.272$ ,  $p = 0.039$ ). Table 3 summarizes the  
246 parameters of this interaction model. Wave V amplitudes were larger than CAP N1 amplitudes, and amplitudes  
247 across the CAP N1 and ABR wave V decreased with age (because CAP N1 is negative,  $\beta > 0$  means that the  
248 CAP N1 magnitude decreased), but age-group differences in amplitude differed between the CAP N1 and the  
249 ABR wave V. Post-hoc linear models found that the amplitude of the CAP N1 response is diminished in older  
250 adults, whereas the ABR wave V response is not significantly different between younger and older adults,

251 suggesting central gain in the midbrain of older  
 252 listeners. Adding hearing thresholds and sex did  
 253 not improve the fit of this model, nor did they prove  
 254 to be significant predictors of response amplitudes.  
 255 **3.4 Neural synchrony is degraded in human AN**  
 256 **and auditory midbrain.** CAP N1 and ABR wave V  
 257 PLV are summarized in Figure 6. Including the  
 258 interaction of age and wave in the model did not  
 259 improve the fit of our main effects model,  
 260 suggesting that PLV decreases with age similarly  
 261 in the CAP N1 and ABR wave V. As reported in  
 262 Table 3, PLV was smaller for older listeners and  
 263 wave V PLV was smaller than CAP N1 PLV.  
 264 Adding hearing thresholds and sex did not  
 265 improve the fit of this model, nor did they prove to  
 266 be significant predictors of PLV.

#### 267 4. Discussion

268 Age-related loss and dysfunction of AN fibers are well-  
 269 established. This loss co-occurs with a loss of neural synchrony,  
 270 contributing to auditory processing deficits with age. However, the  
 271 extent to which the central auditory system can compensate for  
 272 these deficits is largely unknown. Our results suggest that age-  
 273 related decreases in afferent input appear to be partially

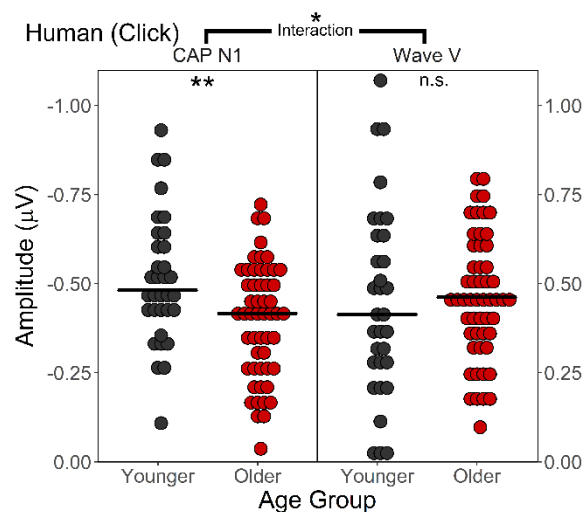

**Figure 5.** CAP N1 and ABR wave V amplitudes measured from younger and older human participants demonstrate age-related central gain. The asterisk on the bracket spanning CAP N1 amplitude and ABR wave V amplitude indicates a significant interaction of wave and age group, indicating that the amplitude of the AN response and the amplitude of the midbrain response are differentially affected by age. Asterisks within the age comparison plots indicate the significance of post-hoc age-related linear models. Detailed statistical results from these analyses appear in Table 3. *n.s.* not significant; *\*p*<0.05; *\*\*p*<0.01; *\*\*\*p*<0.001.

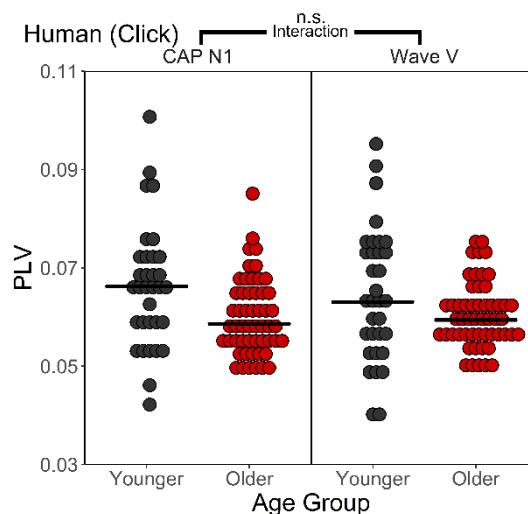

**Figure 6.** CAP N1 and ABR wave V phase-locking values measured from younger and older human participants demonstrate that degradation of neural synchrony occurs in both the peripheral and central portions of the aging auditory system. There is no significant interaction between age group and response source for CAP N1 PLV and ABR wave V PLV. The significant effect of age group (independent of response source) is indicated by asterisks in parentheses. Detailed statistical results from these analyses appear in Table 3. *n.s.* not significant; *\*p*<0.05; *\*\*p*<0.01; *\*\*\*p*<0.001

274 ameliorated by central gain in the brainstem in both mice and humans. Building upon these results, we provide  
275 evidence for the first time for persistent declines in neural synchrony. Taken together, restoration of response  
276 amplitudes with concomitant decreases in neural synchrony are consistent with animal models of decreased  
277 inhibition.

## 278 **Evidence of central gain in the aging auditory system**

279 Amplitude-based analyses of ABR recordings from younger and older mice and humans demonstrate  
280 central gain in the aging mammalian auditory system. While the amplitudes of the responses generated in the  
281 AN are lower in older adults, the responses generated in the auditory midbrain are unaffected by age in  
282 humans (Figure 5) and significantly less affected by age in mice (Figure 3). These results are consistent with  
283 prior studies of the aging auditory system in mice (Parthasarathy & Kujawa, 2018; Sergeyenko et al., 2013),  
284 and in humans (Grose et al., 2019; Psatta & Matei, 1988; Sand, 1991). The model-testing approach taken in  
285 this study demonstrates that the patterns of amplitude and synchrony across regions are not dependent on  
286 hearing thresholds. The age-related decrease in suprathreshold ABR wave I and CAP N1 amplitudes have  
287 been attributed to a loss of low- spontaneous rate (SR) fibers (Schmiedt, 2010), age-related changes to  
288 myelination of the AN (Xing et al., 2012) and degradation of the endocochlear potential (Gratton et al., 1997;  
289 Schulte and Schmiedt 1992).

290 Collecting single-trial ABR and CAP data allows for the examination of inter-trial PLV. Neural synchrony  
291 decreased for human CAP N1 (Figure 6) and for mouse ABR wave I (Figure 4, left column) at all frequencies,  
292 demonstrating an age-related loss of temporal fidelity in AN responses. Mice and humans showed a decrease  
293 in response synchrony from the AN to the brainstem, yet response amplitudes were relatively preserved.  
294 These results are broadly consistent with prior reports following acute AN injury in mice: central gain recovers  
295 responses to rudimentary acoustic features, while precise spike timing remains disrupted (Chambers et al.,  
296 2016). Inconsistent response timing may manifest as perceptual deficits, especially in difficult listening  
297 environments, in which the signal is mixed with additional sources of noise.

298 The preservation of response amplitudes in the aging auditory midbrain, relative to AN responses, is  
299 likely the result of age-related decreases in inhibitory activity and/or decreases in the expression of inhibitory  
300 markers in the auditory brainstem and midbrain, which have been demonstrated in humans (Sharma et al.,

2014) and in animal models (Caspary et al., 2008, Caspary & Llano, 2018), including CBA/CaJ mice (Tang et al., 2014). In older CBA/CaJ mice, SGNs show less GABA<sub>A</sub>R (inhibitory)  $\alpha$ 1 subunit expression and more NMDAR (excitatory) NR1 subunit expression, demonstrating an alteration of the balance of excitation and inhibition in the earliest stages of the auditory pathway (Tang et al., 2014). Furthermore, older CBA/J mice show significantly decreased glycine-mediated inhibition in the cochlear nucleus, which corresponds to increased firing rates in cochlear nucleus neurons (Frisina & Walton, 2006). Farther along the auditory pathway, in the inferior colliculus, single unit recordings reveal an age-related decrease in response latencies to amplitude modulated sounds in CBA/CaJ mice, which likely results from a shift in the excitation/inhibition (E/I) balance towards greater excitation (Simon et al., 2004). In summary, decreased afferent signaling leads to larger response amplitudes at higher auditory centers. Decreased neural synchrony at the level of the AN may be associated with a loss of cochlear synapses or changes in myelin structures. Deficits in neural synchrony may propagate through the auditory system resulting in the decreased midbrain synchrony observed in the current study. However, because inhibition is important for precise signal timing (Cardin, 2018) a loss of inhibition may introduce jitter to the timing of neural activity, which would be reflected in temporally variable latencies across responses, compounding deficits in synchrony in the AN.

If age-related disinhibition is the primary cause of central gain, then we would expect to see decreased response synchrony with relatively preserved response magnitudes in the midbrain. The results reported from both mice and humans in this study support this assertion, suggesting that changes in inhibitory signaling play an important role in age-related central gain. Within-subject studies, comparing inhibitory markers to measures of central gain, will further elucidate the role of age-related disinhibition.

## 5. Conclusions

In summary, we have demonstrated central gain in mice and humans, and further shown that age-related central gain does not ameliorate neural synchrony deficits. Future studies in mice will examine the precise relationship between measurements of age-related central gain and different pathophysiological aspects of aging, including demyelination (Xing et al., 2012), immune response (Noble et al., 2019), cochlear synaptopathy (Wu et al., 2019; Wu et al., 2020), and markers of inhibition and excitation, to better understand which factors have the greatest impact on age-related changes to neural synchrony and central gain. This may provide clinically relevant insights for treatments of age-related hearing deficits, which can be tested in the

329 preclinical mouse model. Lastly, this work will inform future translational studies exploring the implications of  
330 deficient midbrain neural synchrony for cortical responses and auditory perception.

331

### 332 **CRedit Author Statement**

333 **Jeffrey A Rumschlag:** Conceptualization, Methodology, Software, Formal analysis, Resources, Writing –  
334 Original Draft, Writing – Review & Editing, Visualization.

335 **Carolyn M. McClaskey:** Software, Formal analysis, Data Curation, Writing – Review & Editing.

336 **James W. Dias:** Formal analysis, Writing – Review & Editing.

337 **Lilyana B. Kerouac:** Investigation

338 **Kenyaria V. Noble:** Investigation

339 **Clarisse Panganiban:** Investigation

340 **Hainan Lang:** Conceptualization, Methodology, Investigation, Resources, Writing – Review & Editing,  
341 Supervision, Project administration, Funding acquisition.

342 **Kelly C. Harris:** Conceptualization, Methodology, Investigation, Resources, Writing – Review & Editing,  
343 Supervision, Project administration, Funding acquisition.

344

### 345 **Disclosure Statement**

346 None of the authors have conflict of interest, including financial interests in the results described.

### 347 **Acknowledgements**

348 We thank the participants of our study. We thank Brendan J. Balken and Carlene Brandon for their  
349 assistance with data collection.

350

### 351 **Funding**

352 This work was supported (in part) by grants from the National Institute on Deafness and Other  
353 Communication Disorders (NIDCD) of the National Institutes of Health (NIH), R01 DC 014467, R01 DC  
354 017619, P50 DC 000422, K18 DC018517, and T32 DC 014435. This work was supported in part by a SFARI

355 Pilot Award, #649452. The project also received support from the South Carolina Clinical and Translational  
356 Research (SCTR) Institute with an academic home at the Medical University of South Carolina, NIH/NCRR  
357 Grant number UL1 RR 029882. This investigation was conducted in a facility constructed with support from  
358 Research Facilities Improvement Program Grant Number C06 RR 014516 from the National Center for  
359 Research Resources, NIH.



## 360 References

- 361 Brewton, D. H., Kokash, J., Jimenez, O., Pena, E. R., & Razak, K. A. (2016). Age-related deterioration of  
362 perineuronal nets in the primary auditory cortex of mice. *Frontiers in Aging Neuroscience*, 8(NOV), 1–  
363 14. <https://doi.org/10.3389/fnagi.2016.00270>
- 364 Cai, R., Montgomery, S. C., Graves, K. A., Caspary, D. M. & Cox, B. C. The FBN rat model of aging:  
365 investigation of ABR waveforms and ribbon synapse changes. *Neurobiology of Aging* 62, 53–63 (2018).  
366 <https://doi.org/10.1016/j.neurobiolaging.2017.09.034>
- 367 Cardin, J. A. (2018). Inhibitory interneurons regulate temporal precision and correlations in cortical circuits.  
368 *Trends in Neurosciences*, 41(10), 689-700. <https://doi.org/10.1016/j.tins.2018.07.015>
- 369 Caspary, D. M., Ling, L., Turner, J. G., & Hughes, L. F. (2008). Inhibitory neurotransmission, plasticity and  
370 aging in the mammalian central auditory system. *Journal of Experimental Biology*, 211(11), 1781–1791.  
371 <https://doi.org/10.1242/jeb.013581>
- 372 Caspary, D. M., & Llano, D. A. (2018). Aging processes in the subcortical auditory system. *The Oxford*  
373 *Handbook of the Auditory Brainstem*.
- 374 Chambers, A. R., Resnik, J., Yuan, Y., Whitton, J. P., Edge, A. S., Liberman, M. C., & Polley, D. B. (2016).  
375 Central Gain Restores Auditory Processing following Near-Complete Cochlear Denervation. *Neuron*,  
376 89(4), 867–879. <https://doi.org/10.1016/j.neuron.2015.12.041>
- 377 Cisneros-Franco, J. M., Ouellet, L., Kamal, B., & de Villers-Sidani, E. (2018). A brain without brakes: Reduced  
378 inhibition is associated with enhanced but dysregulated plasticity in the aged rat auditory cortex.  
379 *ENeuro*, 5(4). <https://doi.org/10.1523/ENEURO.0051-18.2018>
- 380 Dias, J.W., McClaskey, C.M., Harris, K.C., 2018. Time-compressed speech identification is predicted by  
381 auditory neural processing, perceptuomotor speed, and executive functioning in younger and older  
382 listeners. *J. Assoc. Res. Otolaryngol.* <https://doi.org/10.1007/s10162-018-00703-1>
- 383 Delorme, A. & Makeig, S. (2004). EEGLAB: an open-source toolbox for analysis of single-trial EEG dynamics.  
384 *Journal of Neuroscience Methods*, 134(1), 9-21. <https://doi.org/10.1016/j.jneumeth.2003.10.009>
- 385 Frisina, R. D., & Walton, J. P. (2006). Age-related structural and functional changes in the cochlear nucleus.  
386 *Hearing Research*, 216–217(1–2), 216–223. <https://doi.org/10.1016/j.heares.2006.02.003>
- 387 Gmehlin, D., Kreisel, S. H., Bachmann, S., Weisbrod, M., & Thomas, C. (2011). Age effects on preattentive  
388 and early attentive auditory processing of redundant stimuli: is sensory gating affected by physiological  
389 aging?. *Journals of Gerontology Series A: Biomedical Sciences and Medical Sciences*, 66(10), 1043–  
390 1053. <https://doi.org/10.1093/gerona/qlr067>
- 391 Gratton, M. A., Smyth, B. J., Lam, C. F., Boettcher, F. A., & Schmiedt, R. A. (1997). Decline in the  
392 endocochlear potential corresponds to decreased Na,K-ATPase activity in the lateral wall of quiet-aged  
393 gerbils. *Hearing Research*, 108(1–2), 9–16. [https://doi.org/10.1016/S0378-5955\(97\)00034-8](https://doi.org/10.1016/S0378-5955(97)00034-8)
- 394 Grose, J. H., Buss, E., & Elmore, H. (2019). Age-Related Changes in the Auditory Brainstem Response and  
395 Suprathreshold Processing of Temporal and Spectral Modulation. *Trends in Hearing*, 23, 1–11.  
396 <https://doi.org/10.1177/2331216519839615>
- 397 Harris K. C., Ahlstrom J. B., Dias J. D., Kerouac L., McClaskey C. M., Dubno J. R., Eckert M. A. (2021). Neural  
398 presbycusis in humans inferred from age-related differences in auditory nerve function and structure.  
399 *Journal of Neuroscience*, 41(50), 10293-10304. <https://doi.org/10.1523/JNEUROSCI.1747-21.2021>

- 400 Harris, K. C., Vaden, K. I., McClaskey, C. M., Dias, J. W., & Dubno, J. R. (2018). Complementary metrics of  
401 human auditory nerve function derived from compound action potentials. *Journal of Neurophysiology*,  
402 119(3), 1019–1028. <https://doi.org/10.1152/jn.00638.2017>
- 403 Harris, K. C., Wilson, S., Eckert, M. A., & Dubno, J. R. (2012). Human evoked cortical activity to silent gaps in  
404 noise: Effects of age, attention, and cortical processing speed. *Ear and Hearing*, 33(3), 330–339.  
405 <https://doi.org/10.1097/AUD.0b013e31823fb585>
- 406 Lang H, Kilpatrick LA, Samuvel DJ, Krug EL, Goddard JC (2011). Sox2 up-regulation and glial cell proliferation  
407 following degeneration of spiral ganglion neurons in adult mouse inner ear. *J Assoc Res Otolaryngol*. 12:  
408 151-171. <http://doi.org/10.1007/s10162-010-0244-1>
- 409 Lopez-Calderon, J., & Luck, S. J. (2014). ERPLAB: An open-source toolbox for the analysis of event-related  
410 potentials. *Frontiers in human neuroscience*, 8, 213. <https://doi.org/10.3389/fnhum.2014.00213>
- 411 McClaskey, C. M., Dias, J. W., Dubno, J. R., & Harris, K. C. (2018). Reliability of measures of N1 peak  
412 amplitude of the compound action potential in younger and older adults. *Journal of Speech, Language,*  
413 *and Hearing Research*, 61(9), 2422–2430. [https://doi.org/10.1044/2018\\_JSLHR-H-18-0097](https://doi.org/10.1044/2018_JSLHR-H-18-0097)
- 414 McClaskey, C. M., Panganiban, C. H., Noble, K. V., Dias, J. W., Lang, H., & Harris, K. C. (2020). A multi-metric  
415 approach to characterizing mouse peripheral auditory nerve function using the auditory brainstem  
416 response. *Journal of Neuroscience Methods*, 346(September), 108937.  
417 <https://doi.org/10.1016/j.jneumeth.2020.108937>
- 418 Mohan, A., Thalamuthu, A., Mather, K. A., Zhang, Y., Catts, V. S., Weickert, C. S., & Sachdev, P. S. (2018).  
419 Differential expression of synaptic and interneuron genes in the aging human prefrontal cortex.  
420 *Neurobiology of aging*, 70, 194-202. <https://doi.org/10.1016/j.neurobiolaging.2018.06.011>
- 421 Möhrle, D., Ni, K., Varakina, K., Bing, D., Lee, S. C., Zimmermann, U., Knipper, M., & Rüttiger, L. (2016).  
422 Loss of auditory sensitivity from inner hair cell synaptopathy can be centrally compensated in the young  
423 but not old brain. *Neurobiology of Aging*, 44, 173–184. <https://doi.org/10.1016/j.neurobiolaging.2016.05.001>
- 424 Noble, K. V., Liu, T., Matthews, L. J., Schulte, B. A., & Lang, H. (2019). Age-related changes in immune cells  
425 of the human cochlea. *Frontiers in Neurology*, 10(AUG), 1–13.  
426 <https://doi.org/10.3389/fneur.2019.00895>
- 427 Ouda, L., Druga, R., & Syka, J. (2008). Changes in parvalbumin immunoreactivity with aging in the central  
428 auditory system of the rat. *Experimental Gerontology*, 43(8), 782–789.  
429 <https://doi.org/10.1016/j.exger.2008.04.001>
- 430 Ouellet, L., & de Villers-Sidani, E. (2014). Trajectory of the main GABAergic interneuron populations from early  
431 development to old age in the rat primary auditory cortex. *Frontiers in Neuroanatomy*, 8(JUN), 1–15.  
432 <https://doi.org/10.3389/fnana.2014.00040>
- 433 Parthasarathy, A., & Kujawa, S. G. (2018). Synaptopathy in the Aging Cochlea: Characterizing Early-Neural  
434 Deficits in Auditory Temporal Envelope Processing. *The Journal of Neuroscience*, 38(32), 7108–7119.  
435 <https://doi.org/10.1523/JNEUROSCI.3240-17.2018>
- 436 Pfefferbaum, A., Ford, J.M., Roth, W.T.F., Hopkins, W., Kopell, B.S. (1979). Event-related potential changes in  
437 healthy aged females. *Electroencephalogr. Clin. Neurophysiol*. 46 (1), 81–86.  
438 [https://doi.org/10.1016/0013-4694\(79\)90052-X](https://doi.org/10.1016/0013-4694(79)90052-X)

- 439 Price, D., Tyler, L.K., Neto Henriques, R., Campbell, K.L., Williams, N., Treder, M.S., Taylor, J.R., Cam,  
440 C.A.N., Henson, R.N.A. (2017). Age-related delay in visual and auditory evoked responses is mediated  
441 by white- and grey-matter differences. *Nat. Commun.* 8, 15671. <https://doi.org/10.1038/ncomms15671>
- 442 Psatta, D. M., & Matei, M. (1988). Age-dependent amplitude variation of brain-stem auditory evoked potentials.  
443 *Electroencephalography and Clinical Neurophysiology/ Evoked Potentials*, 71(1), 27–32.  
444 [https://doi.org/10.1016/0168-5597\(88\)90016-0](https://doi.org/10.1016/0168-5597(88)90016-0)
- 445 Rogalla, M. M., & Hildebrandt, J. K. (2020). Aging but not age-related hearing loss dominates the decrease of  
446 parvalbumin immunoreactivity in the primary auditory cortex of mice. *eNeuro*, 7(3).  
447 <https://doi.org/10.1523/ENEURO.0511-19.2020>
- 448 Sand, T. (1991). BAEP amplitudes and amplitude ratios: relation to click polarity, rate, age and sex.  
449 *Electroencephalography and Clinical Neurophysiology*, 78(4), 291–296. [https://doi.org/10.1016/0013-](https://doi.org/10.1016/0013-4694(91)90183-5)  
450 [4694\(91\)90183-5](https://doi.org/10.1016/0013-4694(91)90183-5)
- 451 Schrode, K. M., Muniak, M. A., Kim, Y. H., & Lauer, A. M. (2018). Central compensation in auditory brainstem  
452 after damaging noise exposure. *eNeuro*, 5(4). <https://doi.org/10.1523/ENEURO.0250-18.2018>
- 453 Schmiedt, R. A. (2010). *The Physiology of Cochlear Presbycusis*. 9–38. [https://doi.org/10.1007/978-1-4419-](https://doi.org/10.1007/978-1-4419-0993-0_2)  
454 [0993-0\\_2](https://doi.org/10.1007/978-1-4419-0993-0_2)
- 455 Schulte, B. A., & Schmiedt, R. A. (1992). Lateral wall Na, K-ATPase and endocochlear potentials decline with  
456 age in quiet-reared gerbils. *Hearing Research*, 61(1–2), 35–46. [https://doi.org/10.1016/0378-](https://doi.org/10.1016/0378-5955(92)90034-K)  
457 [5955\(92\)90034-K](https://doi.org/10.1016/0378-5955(92)90034-K)
- 458 Sergeyenko, Y., Lall, K., Liberman, M. C., & Kujawa, S. G. (2013). Age-Related Cochlear Synaptopathy: An  
459 Early-Onset Contributor to Auditory Functional Decline. *Journal of Neuroscience*, 33(34), 13686–13694.  
460 <https://doi.org/10.1523/JNEUROSCI.1783-13.2013>
- 461 Sharma, S., Nag, T. C., Thakar, A., Bhardwaj, D. N., & Roy, T. S. (2014). The aging human cochlear nucleus:  
462 Changes in the glial fibrillary acidic protein, intracellular calcium regulatory proteins, GABA  
463 neurotransmitter and cholinergic receptor. *Journal of Chemical Neuroanatomy*, 56, 1–12.  
464 <https://doi.org/10.1016/j.jchemneu.2013.12.001>
- 465 Simon, H., Frisina, R. D., & Walton, J. P. (2004). Age reduces response latency of mouse inferior colliculus  
466 neurons to AM sounds. *The Journal of the Acoustical Society of America*, 116(1), 469–477.  
467 <https://doi.org/10.1121/1.1760796>
- 468 Tang, X., Zhu, X., Ding, B., Walton, J. P., Frisina, R. D., & Su, J. (2014). Age-related hearing loss: GABA,  
469 nicotinic acetylcholine and NMDA receptor expression changes in spiral ganglion neurons of the  
470 mouse. *Neuroscience*, 259, 184–193. <https://doi.org/10.1016/j.neuroscience.2013.11.058>
- 471 Tremblay, K.L., Billings, C., Rohila, N., 2004. Speech evoked cortical potentials: effects of age and stimulus  
472 presentation rate. *J. Am. Acad. Audiol.* 15 (3), 226–237. <https://doi.org/10.3766/jaaa.15.3.5>
- 473 Ueno, H., Takao, K., Suemitsu, S., Murakami, S., Kitamura, N., Wani, K., Okamoto, M., Aoki, S., & Ishihara, T.  
474 (2018). Age-dependent and region-specific alteration of parvalbumin neurons and perineuronal nets in  
475 the mouse cerebral cortex. *Neurochemistry International*, 112, 59–70.  
476 <https://doi.org/10.1016/j.neuint.2017.11.001>
- 477 Xing, Y., Samuvel, D. J., Stevens, S. M., Dubno, J. R., Schulte, B. A., & Lang, H. (2012). Age-related changes  
478 of myelin basic protein in mouse and human auditory nerve. *PLoS ONE*, 7(4).  
479 <https://doi.org/10.1371/journal.pone.0034500>

- 480 Woods, D.L., Clayworth, C.C., 1986. Age-related changes in human middle latency auditory evoked potentials.  
481 Electroencephalogr. Clin. Neurophysiology Evoked Potentials Sect. 65 (4), 297–303.  
482 [https://doi.org/10.1016/0168-5597\(86\)90008-0](https://doi.org/10.1016/0168-5597(86)90008-0)
- 483 Wu, P. Z., Liberman, L. D., Bennett, K., de Gruttola, V., O'Malley, J. T., & Liberman, M. C. (2019). Primary  
484 Neural Degeneration in the Human Cochlea: Evidence for Hidden Hearing Loss in the Aging Ear.  
485 *Neuroscience*, 407, 8–20. <https://doi.org/10.1016/j.neuroscience.2018.07.053>
- 486 Wu, P. Z., O'Malley, J. T., de Gruttola, V., & Charles Liberman, M. (2020). Age-related hearing loss is  
487 dominated by damage to inner ear sensory cells, not the cellular battery that powers them. *Journal of*  
488 *Neuroscience*, 40(33), 6357–6366. <https://doi.org/10.1523/JNEUROSCI.093720.2020>
- 489

## 490 **Figure Captions**

491 **Figure 1.** (A) ABR wave I thresholds in older mice are moderately elevated. (B) Right-ear pure-tone  
492 audiometric thresholds for younger and older human participants demonstrate greater hearing loss at higher  
493 frequencies. Error bars represent 95% confidence intervals.

494 **Figure 2.** (A) Peak measurement locations for wave I and wave V are shown with vertical dotted lines on  
495 grand average ABR waveforms from younger (black line) and older (red line) mice, elicited by 11 kHz tone  
496 pips. (B) Average CAP and ABR waveforms recorded from younger (black line) and older (red line) humans  
497 are shown. The CAP N1 and ABR wave V are traced in thicker lines. (C) Average PLV heatmaps from mice  
498 depict synchronous activity corresponding to waves I and V of the ABR. (D) Average PLV heatmaps from  
499 human CAP (left panel) and ABR (right panel) recordings are shown on the same time axis, with 0-4 ms of the  
500 CAP and 4.3-8 ms of the ABR, to capture the CAP N1 and the ABR wave V.

501 **Figure 3.** ABR wave I and wave V amplitudes from younger and older CBA/CaJ mice in response to 5.6 kHz  
502 (A), 11.3 kHz (B), and 40 kHz (C) tone pips demonstrate age-related central gain. Asterisks on brackets  
503 spanning wave I and wave V indicate a significant interaction of wave and age group. Asterisks within the age  
504 comparison plots indicate a significant post-hoc age-related effect. Detailed statistical results from these  
505 analyses appear in **Table 1**. *n.s.* not significant; \* $p < 0.05$ ; \*\* $p < 0.01$ ; \*\*\* $p < 0.001$ .

506 **Figure 4.** ABR wave I and wave V phase-locking values measured from younger and older CBA/CaJ mice in  
507 response to 5.6 kHz (A), 11.3 kHz (B), and 40 kHz (C) tone pips demonstrate age-related degradation of  
508 neural synchrony in peripheral and central portions of the auditory system, which appear to be less severe in  
509 the midbrain at lower frequencies. Neural synchrony measurements (PLV) for 5.6 kHz (A) show a significant  
510 interaction of age group and wave, whereas PLV for 11.3 kHz (B) and 40 kHz (C) do not. Asterisks on brackets  
511 spanning wave I and wave V indicate a significant interaction of wave and age group. Asterisks within age  
512 comparison plots indicate a significant post-hoc age-related effect. Detailed statistical results from these  
513 analyses appear in **Table 2**. *n.s.* not significant; \* $p < 0.05$ ; \*\* $p < 0.01$ ; \*\*\* $p < 0.001$ .

514 **Figure 5.** CAP N1 and ABR wave V amplitudes measured from younger and older human participants  
515 demonstrate age-related central gain. The asterisk on the bracket spanning CAP N1 amplitude and ABR wave  
516 V amplitude indicates a significant interaction of wave and age group, indicating that the amplitude of the AN  
517 response and the amplitude of the midbrain response are differentially affected by age. Asterisks within the

518 age comparison plots indicate the significance of post-hoc age-related linear models. Detailed statistical results  
519 from these analyses appear in Table 3. *n.s. not significant; \*p<0.05; \*\*p<0.01; \*\*\*p<0.001.*

520 **Figure 6.** CAP N1 and ABR wave V phase-locking values measured from younger and older human  
521 participants demonstrate that degradation of neural synchrony occurs in both the peripheral and central  
522 portions of the aging auditory system. There is no significant interaction between age group and response  
523 source for CAP N1 PLV and ABR wave V PLV. The significant effect of age group (independent of response  
524 source) is indicated by asterisks in parentheses. Detailed statistical results from these analyses appear in  
525 Table 3. *n.s. not significant; \*p<0.05; \*\*p<0.01; \*\*\*p<0.001*

526

**Table 1. Mouse ABR Amplitude**

|                                                                        | $B$    | $SE_B$ | $\beta$ | $SE_\beta$ | $t$     | $p$    |     |
|------------------------------------------------------------------------|--------|--------|---------|------------|---------|--------|-----|
| <b><i>Mouse 5.6 kHz Amplitude: Age and Wave Interaction Model</i></b>  |        |        |         |            |         |        |     |
| Intercept                                                              | 0.226  | 0.017  | 0.291   | 0.123      | 13.552  | <0.001 | *** |
| Age Group                                                              | -0.201 | 0.027  | -0.903  | 0.123      | -7.315  | <0.001 | *** |
| Wave                                                                   | -0.129 | 0.020  | -0.582  | 0.148      | -6.433  | <0.001 | *** |
| Age Group x Wave                                                       | 0.179  | 0.033  | 0.806   | 0.149      | 5.427   | <0.001 | *** |
| Post-hoc Linear Models                                                 |        |        |         |            |         |        |     |
| <b>Wave I</b>                                                          |        |        |         |            |         |        |     |
| Intercept                                                              | 0.226  | 0.020  | 0.000   | 0.119      | 11.072  | <0.001 | *** |
| Age Group                                                              | -0.201 | 0.034  | -0.721  | 0.121      | -5.976  | <0.001 | *** |
| <b>Wave V</b>                                                          |        |        |         |            |         |        |     |
| Intercept                                                              | 0.097  | 0.012  | 0.000   | 0.169      | 8.193   | <0.001 | *** |
| Age Group                                                              | -0.021 | 0.019  | -0.188  | -0.171     | -1.099  | 0.280  |     |
| <b><i>Mouse 11.3 kHz Amplitude: Age and Wave Interaction Model</i></b> |        |        |         |            |         |        |     |
| Intercept                                                              | 0.486  | 0.022  | 0.215   | 0.092      | 22.258  | <0.001 | *** |
| Age Group                                                              | -0.382 | 0.035  | -1.021  | 0.092      | -11.063 | <0.001 | *** |
| Wave                                                                   | -0.162 | 0.024  | -0.429  | 0.100      | -6.834  | <0.001 | *** |
| Age Group x Wave                                                       | 0.208  | 0.038  | 0.557   | 0.100      | 5.538   | <0.001 | *** |
| Post-hoc Linear Models                                                 |        |        |         |            |         |        |     |
| <b>Wave I</b>                                                          |        |        |         |            |         |        |     |
| Intercept                                                              | 0.486  | 0.026  | 0.000   | 0.087      | 19.021  | <0.001 | *** |
| Age Group                                                              | -0.382 | 0.040  | -0.838  | 0.089      | -9.454  | <0.001 | *** |
| <b>Wave V</b>                                                          |        |        |         |            |         |        |     |
| Intercept                                                              | 0.323  | 0.017  | 0.000   | 0.112      | 18.661  | <0.001 | *** |
| Age Group                                                              | -0.174 | 0.027  | -0.717  | 0.113      | -6.339  | <0.001 | *** |
| <b><i>Mouse 40 kHz Amplitude: Age and Wave Interaction Model</i></b>   |        |        |         |            |         |        |     |
| Intercept                                                              | 0.288  | 0.017  | 0.123   | 0.119      | 16.688  | <0.001 | *** |
| Age Group                                                              | -0.215 | 0.029  | -0.886  | 0.119      | -7.447  | <0.001 | *** |
| Wave                                                                   | -0.065 | 0.017  | -0.246  | 0.119      | -3.746  | <0.001 | *** |
| Age Group x Wave                                                       | 0.102  | 0.029  | 0.421   | 0.120      | 3.515   | 0.001  | **  |
| Post-hoc Linear Models                                                 |        |        |         |            |         |        |     |
| <b>Wave I</b>                                                          |        |        |         |            |         |        |     |
| Intercept                                                              | 0.288  | 0.019  | 0.000   | 0.110      | 15.340  | <0.001 | *** |
| Age Group                                                              | -0.215 | 0.032  | -0.754  | 0.111      | -6.790  | <0.001 | *** |
| <b>Wave V</b>                                                          |        |        |         |            |         |        |     |
| Intercept                                                              | 0.224  | 0.015  | 0.000   | 0.133      | 14.993  | <0.001 | *** |
| Age Group                                                              | -0.113 | 0.025  | -0.604  | -0.135     | -4.486  | <0.001 | *** |

Notes: \*p < 0.05, \*\*p < 0.01, \*\*\*p < 0.001.

527

528

529

**Table 2. Mouse PLV 5.6 kHz**

|                                                                 | $B$    | $SE_B$ | $\beta$ | $SE_\beta$ | $t$    | $p$    |     |
|-----------------------------------------------------------------|--------|--------|---------|------------|--------|--------|-----|
| <b><i>Mouse 5.6 kHz PLV: Age and Wave Interaction Model</i></b> |        |        |         |            |        |        |     |
| Intercept                                                       | 0.700  | 0.029  | 0.300   | 0.103      | 24.401 | <0.001 | *** |
| Age Group                                                       | -0.407 | 0.047  | -0.895  | 0.104      | -8.650 | <0.001 | *** |
| Wave                                                            | -0.190 | 0.026  | -0.600  | 0.092      | -7.406 | <0.001 | *** |
| Age Group x Wave                                                | 0.154  | 0.042  | 0.340   | 0.093      | 3.666  | <0.001 | *** |
| Post-hoc Linear Models                                          |        |        |         |            |        |        |     |
| <b>Wave I</b>                                                   |        |        |         |            |        |        |     |
| Intercept                                                       | 0.700  | 0.028  | 0.000   | 0.093      | 25.288 | <0.001 | *** |
| Age Group                                                       | -0.407 | 0.045  | -0.842  | 0.094      | -8.965 | <0.001 | *** |
| <b>Wave V</b>                                                   |        |        |         |            |        |        |     |
| Intercept                                                       | 0.510  | 0.030  | 0.000   | 0.127      | 17.187 | <0.001 | *** |
| Age Group                                                       | -0.253 | 0.049  | -0.671  | 0.129      | -5.192 | <0.001 | *** |
| <b><i>Mouse 11.3 kHz PLV: Age and Wave Model</i></b>            |        |        |         |            |        |        |     |
| Intercept                                                       | 0.832  | 0.028  | 0.247   | 0.101      | 29.530 | <0.001 | *** |
| Age Group                                                       | -0.332 | 0.042  | -0.736  | 0.094      | -7.842 | <0.001 | *** |
| Wave                                                            | -0.110 | 0.018  | -0.493  | 0.080      | -6.189 | <0.001 | *** |
| <b><i>Mouse 40 kHz PLV: Age and Wave Model</i></b>              |        |        |         |            |        |        |     |
| Intercept                                                       | 0.692  | 0.025  | 0.292   | 0.111      | 27.921 | <0.001 | *** |
| Age Group                                                       | -0.276 | 0.036  | -0.694  | 0.091      | -7.672 | <0.001 | *** |
| Wave                                                            | -0.112 | 0.024  | -0.584  | 0.128      | -4.565 | <0.001 | *** |

Notes: \* $p < 0.05$ , \*\* $p < 0.01$ , \*\*\* $p < 0.001$ .

530

531

532



**Table 3. Human CAP and ABR Amplitude (Click)**

|                                                               | $B$    | $SE_B$ | $\beta$ | $SE_\beta$ | $t$     | $p$    |     |
|---------------------------------------------------------------|--------|--------|---------|------------|---------|--------|-----|
| <b><i>Human Amplitude: Age and Wave Interaction Model</i></b> |        |        |         |            |         |        |     |
| Intercept                                                     | -0.519 | 0.034  | -0.854  | 0.043      | -15.162 | <0.001 | *** |
| Age Group                                                     | 0.131† | 0.044  | 0.128†  | 0.043      | 2.942   | 0.004  | **  |
| Wave                                                          | 0.984  | 0.050  | 1.799   | 0.063      | 19.607  | <0.001 | *** |
| Age Group x Wave                                              | -0.133 | 0.065  | -0.130  | 0.063      | -2.056  | 0.041  | *   |
| Post-hoc Linear Models                                        |        |        |         |            |         |        |     |
| <b>CAP N1</b>                                                 |        |        |         |            |         |        |     |
| Intercept                                                     | -0.519 | 0.032  | 0.000   | 0.098      | -16.168 | <0.001 | *** |
| Age Group                                                     | 0.131† | 0.042  | 0.308†  | 0.098      | 3.137   | 0.002  | **  |
| <b>ABR Wave V</b>                                             |        |        |         |            |         |        |     |
| Intercept                                                     | 0.465  | 0.039  | 0.000   | 0.108      | 11.900  | <0.001 | *** |
| Age Group                                                     | -0.002 | 0.050  | -0.005  | 0.109      | -0.045  | 0.965  |     |

Notes: \* $p < 0.05$ , \*\* $p < 0.01$ , \*\*\* $p < 0.001$ . †Because the CAP N1 amplitude is negative, these positive  $B$  and  $\beta$  values denote a decrease in response magnitude with age.

| <b><i>Human PLV: Age and Wave</i></b> |        |       |        |       |        |        |     |
|---------------------------------------|--------|-------|--------|-------|--------|--------|-----|
| Intercept                             | 0.066  | 0.002 | 0.033  | 0.099 | 43.887 | <0.001 | *** |
| Age Group                             | -0.006 | 0.002 | -0.260 | 0.077 | -3.371 | 0.001  | **  |
| Wave                                  | -0.001 | 0.001 | -0.075 | 0.132 | -0.570 | 0.570  |     |

Notes: \* $p < 0.05$ , \*\* $p < 0.01$ , \*\*\* $p < 0.001$ .

533  
534

535  
536  
537  
538
